# Supplementary material for: Independent evolution of functionally exchangeable mitochondrial outer membrane import complexes
Source: eLife. 2018 Jun 20;7:e34488. doi: 10.7554/eLife.34488 (PMC6010339; doi:10.7554/eLife.34488)
Supplement: Figure 3—source data 1. — Orinigal data used for quantification in Figure 3B. [file elife-34488-fig3-data1.xlsx]

## Sheet: Fig. 3B
Tom70	experiment number	1	2	3	4	average	SD		t test
WT	Ø	100	100	100	100	100	0		0.00329343
	pATOM36	79.3556	57.1863		127.623	88.055	36.0152
mim1Δmim2Δ	Ø	48.074	27.6568	27.435	21.3722	31.1345	11.6623
	pATOM36	72.5678	63.9114	59.908	87.6167	71.001	12.2726
Ugo1	experiment number	1	2	3	average	SD
WT	WT Ø	100	100	100	100	0
	pATOM36	112.383	144.626	185.611	147.54	36.7006
mim1Δmim2Δ	ΔΔØ	35.7608	19.9102	45.3042	33.6584	12.8269
	pATOM36	55.5484	53.0861	41.7752	50.1366	7.34507
Tom20	experiment number	1	2	3	4	average	SD		t test
WT	WT Ø	100	100	100	100	100	0		0.000275992
	pATOM36	120.476	122.038	201.99	167.586	153.022	39.2819
mim1Δmim2Δ	ΔΔØ	13.6454	10.6818	12.0006	1.78654	9.52857	5.30182
	pATOM36	93.9567	68.6008	109.268	121.698	98.3808	22.8666
