# Supplementary material for: Independent evolution of functionally exchangeable mitochondrial outer membrane import complexes
Source: eLife. 2018 Jun 20;7:e34488. doi: 10.7554/eLife.34488 (PMC6010339; doi:10.7554/eLife.34488)
Supplement: Figure 5—source data 1. — Original data used for quantification in Figure 5B. [file elife-34488-fig5-data1.xlsx]

## Sheet: Figure 5B
		counts						%
		1	2	3				1	2	3		average	SD
WT + Ø	tubular	97	67	100		WT + Ø	tubular	89.8148	83.75	94.3396		89.3015	4.33841
	fragmented	11	13	6			fragmented	10.1852	16.25	5.66038		10.6985	4.33841
mim1Δ + Ø	tubular	6	19	4		mim1Δ + Ø	tubular	12	18.2692	3.07692		11.1154	6.2337
	fragmented	44	85	126			fragmented	88	81.7308	96.9231		88.8846	6.2337
mim2Δ + Ø	tubular	17	15	10		mim2Δ + Ø	tubular	18.0851	14.7059	9.80392		14.1983	3.39978
	fragmented	77	87	92			fragmented	81.9149	85.2941	90.1961		85.8017	3.39978
mim1Δ/mim2Δ + Ø	tubular	9	7	7		mim1Δ/mim2Δ + Ø	tubular	8.18182	6.30631	6.60377		7.03063	0.82302
	fragmented	101	104	99			fragmented	91.8182	93.6937	93.3962		92.9694	0.82302
WT + pATOM36	tubular	110	107	99		WT + pATOM36	tubular	98.2143	97.2727	92.5234		96.0035	2.49064
	fragmented	2	3	8			fragmented	1.78571	2.72727	7.47664		3.99654	2.49064
mim1Δ + pATOM36	tubular	122	99	101		mim1Δ + pATOM36	tubular	95.3125	94.2857	90.1786		93.2589	2.21811
	fragmented	6	6	11			fragmented	4.6875	5.71429	9.82143		6.74107	2.21811
mim2Δ + pATOM36	tubular	106	99	114		mim2Δ + pATOM36	tubular	97.2477	93.3962	97.4359		96.0266	1.86155
	fragmented	3	7	3			fragmented	2.75229	6.60377	2.5641		3.97339	1.86155
mim1Δ/mim2Δ + pATOM36	tubular	103	106	99		mim1Δ/mim2Δ + pATOM36	tubular	91.1504	94.6429	96.1165		93.9699	2.08248
	fragmented	10	6	4			fragmented	8.84956	5.35714	3.8835		6.03007	2.08248
WT + Ø
mim1Δ + Ø
mim2Δ + Ø
mim1Δ/mim2Δ + Ø
WT + pATOM36
mim1Δ + pATOM36
mim2Δ + pATOM36
mim1Δ/mim2Δ + pATOM36
